# Supplementary material for: Deficiency of miR-29b2/c leads to accelerated aging and neuroprotection in MPTP-induced Parkinson’s disease mice
Source: Aging (Albany NY). 2021 Sep 20;13(18):22390–411. doi: 10.18632/aging.203545 (PMC8507277; doi:10.18632/aging.203545)
Supplement: Supplementary Figures [file aging-13-203545-s001.pdf]

## SUPPLEMENTARY FIGURES

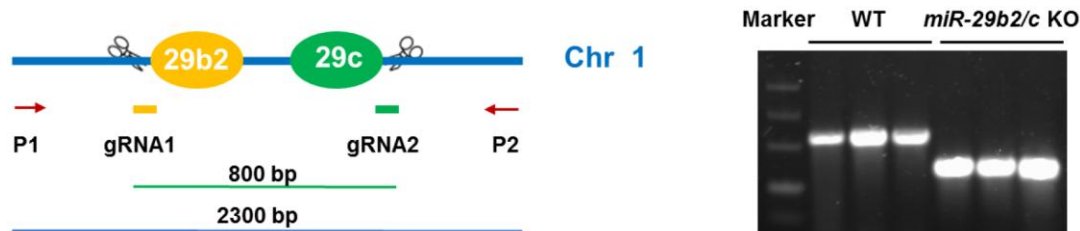

Supplementary Figure 1. The strategy of *miR-29b2/c* knockout in mice and identification of *miR-29b2/c* KO mice.

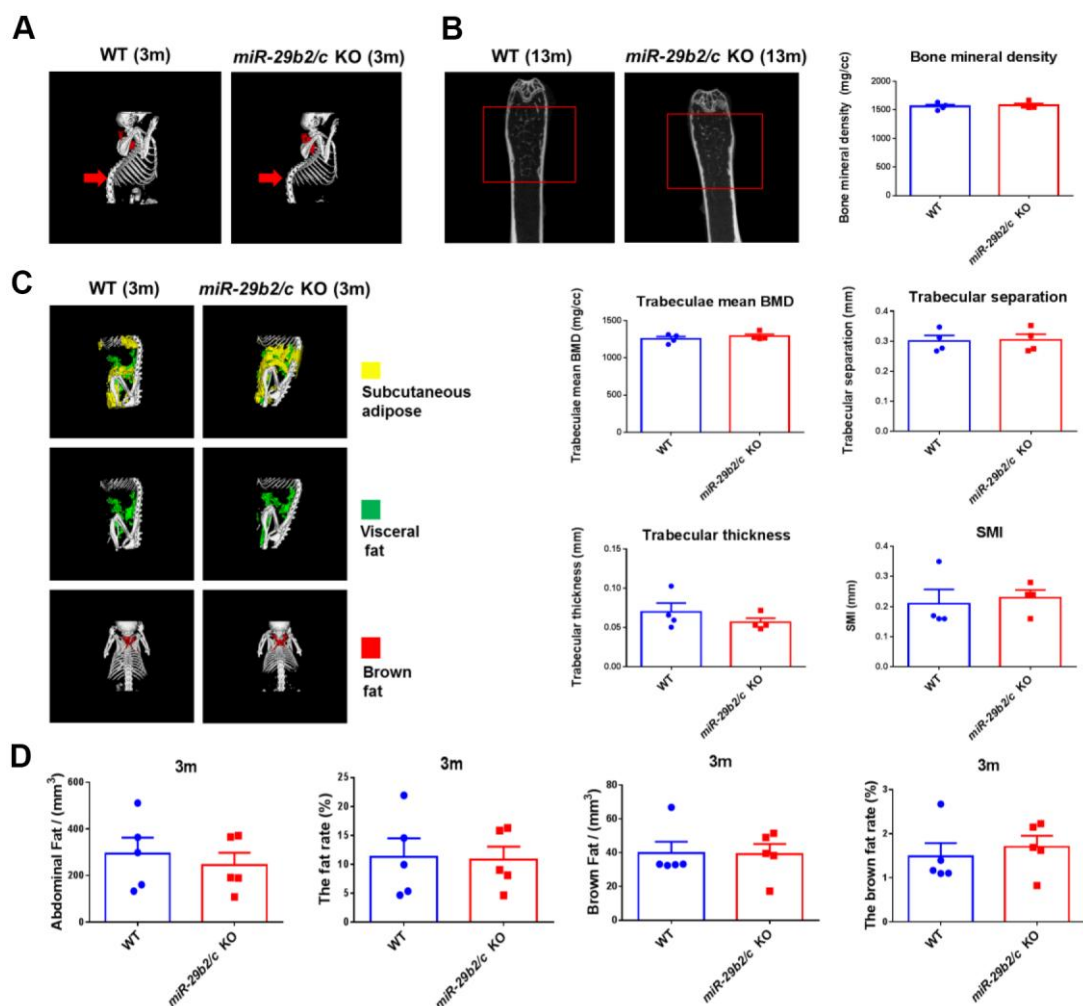

Supplementary Figure 2. Peripheral characteristics of WT and *miR-29b2/c* KO mice. (A) micro-CT scan of bone of WT and *miR-29b2/c* KO mice at 3 months old. (B) microCT scan of trabecular bone of WT and *miR-29b2/c* KO mice at 13 months old. Bone mineral density (BMD), trabecular mean BMD, trabecular separation, trabecular thickness and structural model index (SMI) are also shown. mg/cc: milligram/cubic centimeter; mm: millimeter. n=4. (C) microCT scan of abdominal fat (subcutaneous fat and visceral fat together) and brown fat of WT and *miR-29b2/c* KO mice at 3 months old. (D) The content and ratio analysis of abdominal fat and brown fat are shown. n=5.

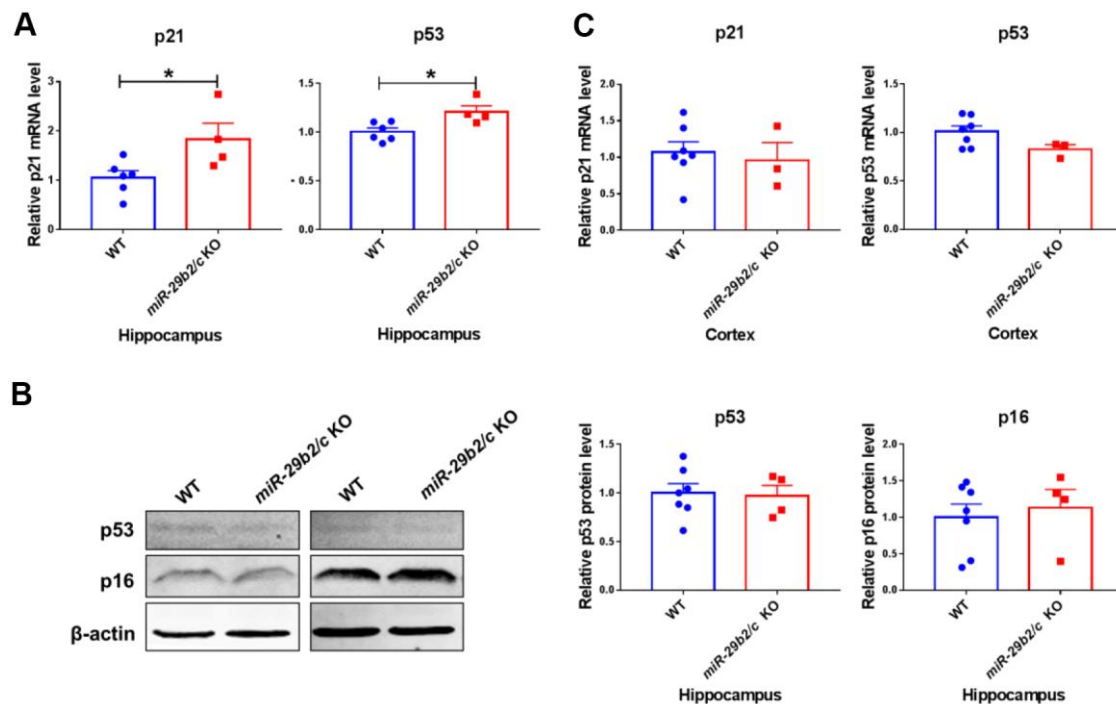

**Supplementary Figure 3. The expression of senescence marker genes in the hippocampus and cortex of WT and *miR-29b2/c* KO mice at 6 months old.** (A) qPCR analysis of *p21* and *p53* transcripts in the hippocampus. The differences were analyzed by Student-T-test.  $n=4-6$ .  $*p < 0.05$ . (B) Western blot analysis of p53 and p16 protein expression in the hippocampus. β-actin served as a loading control. Quantification of relative p53 and p16 expression levels are shown in the right panel.  $n=4-7$ . (C) qPCR analysis of *p21* and *p53* transcripts in the cortex.  $n=3-7$ .

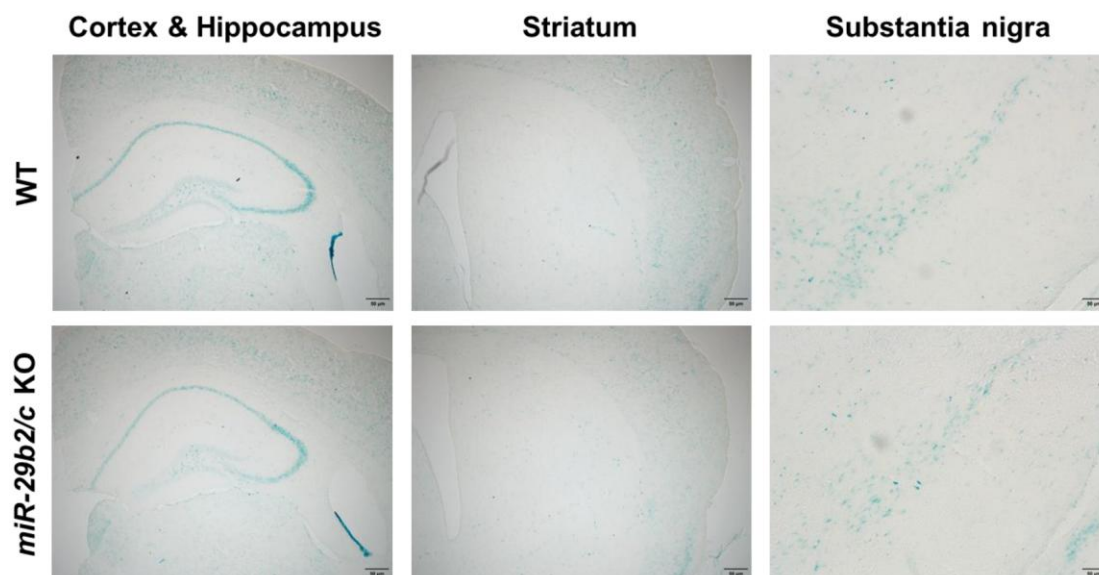

**Supplementary Figure 4. β-galactosidase activity in the cortex, hippocampus, striatum and substantia nigra of 3-month-old WT and *miR-29b2/c* KO mice.** Scale bar: 50 μm.

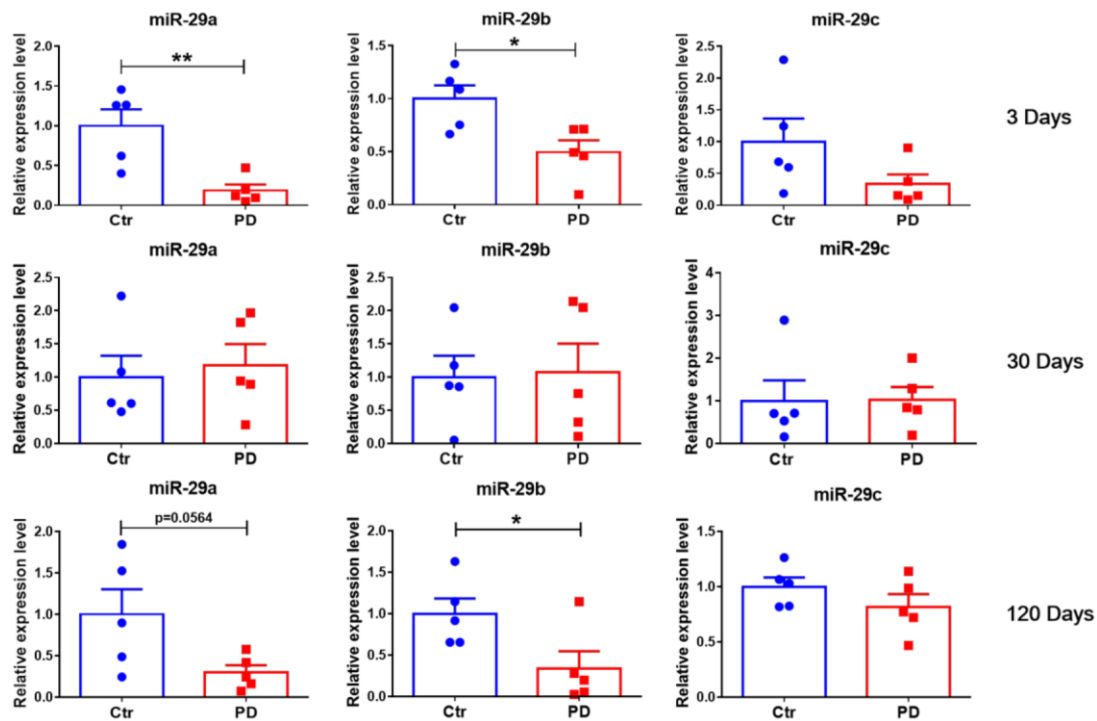

**Supplementary Figure 5. The expression levels of miR-29s in the serum of MPTP-induced PD mice.** miR-29s levels in the serum of control and PD mice at 3, 30 and 120 days after the administration of subacute regimen of MPTP were shown. n=5. The differences were analyzed by Student-T-test. \* $p < 0.05$  and \*\* $p < 0.01$ .

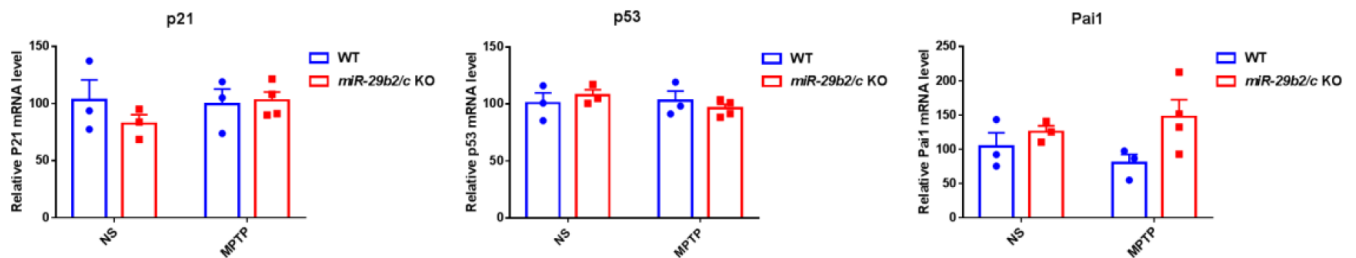

**Supplementary Figure 6. The expression levels of senescence marker genes in the striatum of WT and miR-29b2/c KO mice at 3 days after MPTP injection.** qPCR analysis of p21, p53 and Pai1 transcripts in the striatum of WT and miR-29b2/c KO mice. n=3-4.

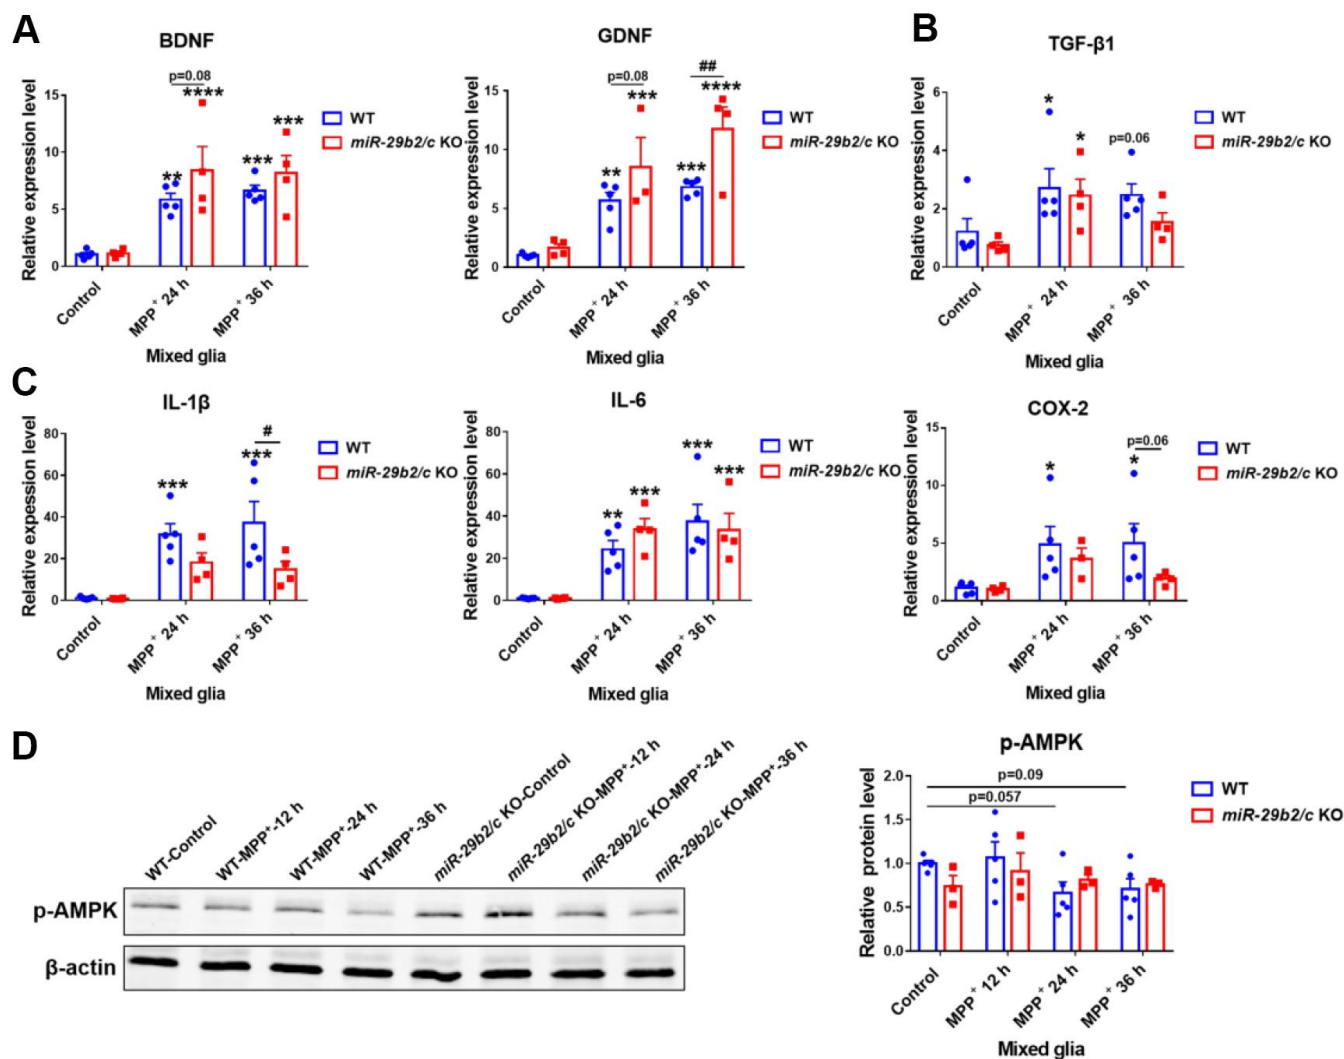

**Supplementary Figure 7. Effects of *miR-29b2/c* deficiency in MPP<sup>+</sup>-treated primary mixed glia.** qPCR analysis of neurotrophic factor *BDNF*, *GDNF* (A), anti-inflammatory factor *TGF-β1* (B) and pro-inflammatory factors *IL-1β*, *IL-6* and *COX-2* (C) transcripts in WT and *miR-29b2/c* KO primary mixed glia treated with PBS or MPP<sup>+</sup> for 24 h and 36 h. n=3-5. (D) Western blot analysis of p-AMPK protein expression in WT and *miR-29b2/c* KO primary mixed glia treated with PBS or MPP<sup>+</sup> for 12, 24 and 36 h. β-actin served as a loading control. Quantification of relative p-AMPK is shown in the right panel. n=3-5. The differences were analyzed by two-way ANOVA followed by LSD multiple comparison tests. \**p*<0.05, \*\**p*<0.01, \*\*\**p*<0.001 and \*\*\*\**p*<0.0001, vs PBS control. #*p*<0.05 and ##*p*<0.01, vs WT group.

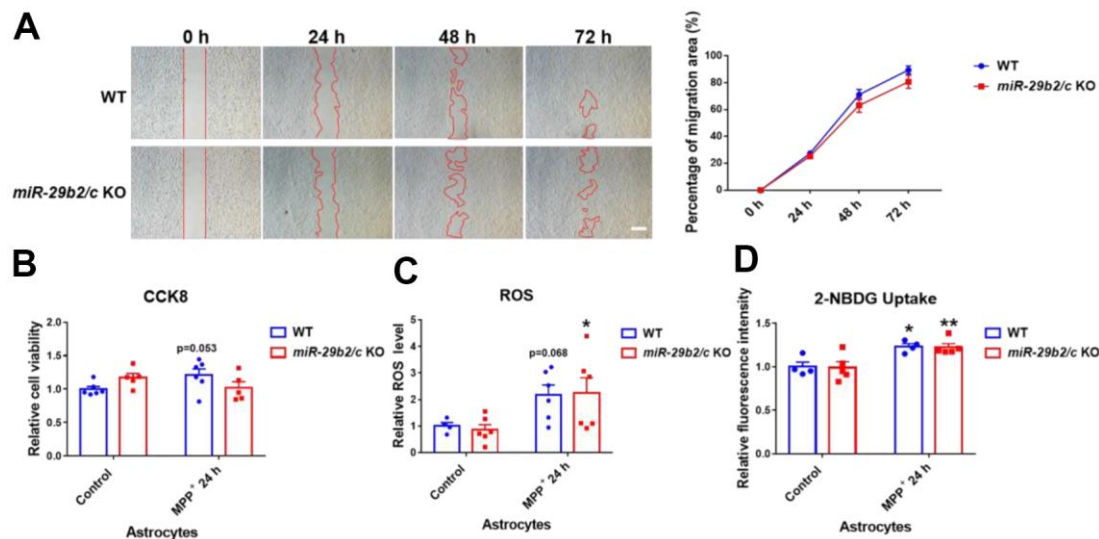

**Supplementary Figure 8.** (A) The scratch assay of WT and *miR-29b2/c* KO primary astrocytes at 0 h, 24 h, 48 h and 72 h. Scale bar: 100  $\mu$ m. Percentage of scratch area is shown in the right panel.  $n=7-8$ . (B–D) Cell viability, ROS levels and glucose uptake capacities of WT and *miR-29b2/c* KO primary astrocytes. The results of CCK8 assay (B), ROS production levels (C) and 2-NBDG uptake levels (D) of WT and *miR-29b2/c* KO primary astrocytes treated with PBS or MPP<sup>+</sup> for 24 h.  $n=4-6$ . The differences were analyzed by two-way ANOVA followed by LSD multiple comparison tests.  $*p < 0.05$ ,  $**p < 0.01$ , vs PBS control.

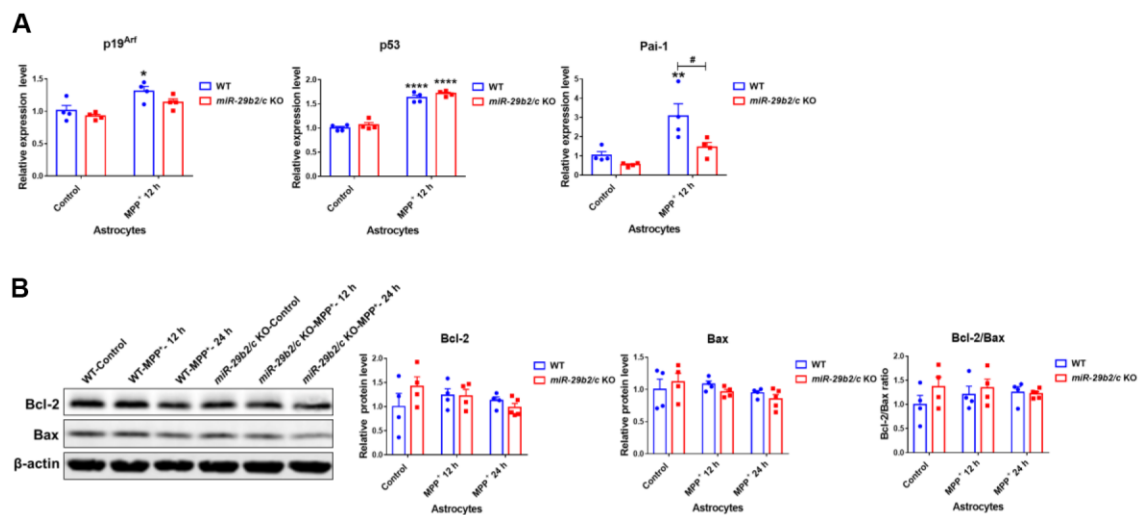

**Supplementary Figure 9.** (A) qPCR analysis of aging markers *p19<sup>Arf</sup>*, *p53* and *Pai1* transcripts in WT and *miR-29b2/c* KO primary astrocytes treated with PBS or MPP<sup>+</sup> for 12 h.  $n=4$ . The differences were analyzed by two-way ANOVA followed by LSD multiple comparison tests.  $*p < 0.05$ ,  $**p < 0.01$  and  $****p < 0.0001$ , vs PBS control.  $\#p < 0.05$ , vs WT group. (B) Western blot analysis of Bcl-2 and Bax protein expression in WT and *miR-29b2/c* KO primary astrocytes treated with PBS or MPP<sup>+</sup> for 12 h and 24 h.  $\beta$ -actin served as a loading control. Quantification of relative Bcl-2 proteins and Bax proteins and their ratio are shown in the right panel.  $n=4-5$ .

**A**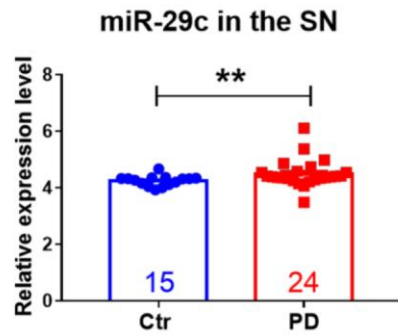**B**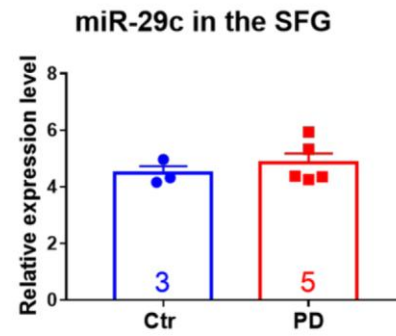

**Supplementary Figure 10. The expression of miR-29c in the substantia nigra (SN), and the expression of miR-29c in the superior frontal gyrus (SFG) in PD patients and control subjects. (A) The expression of miR-29c in the SN. The differences were analyzed by Mann-Whitney test.  $**p < 0.01$ . (B) The expression of miR-29c in the SFG. Data are from GEO profiles [Parkinson's disease: substantia nigra (HG-U133B)].**
